# Supplementary material for: The oxygen reduction reaction of ordered porous carbon-supported PtSn catalysts
Source: Royal Society of Chemistry journal article supplement (doi:10.1039/c5ra27439g), 2016-01-01
Supplement: c5ra27439g1.pdf [file c5ra27439g1.pdf]

## ***Supporting information***

### **The oxygen reduction reaction of ordered porous carbon-supported PtSn catalysts**

Chin-Tien Shen<sup>a</sup>, Kuan-Wen Wang<sup>b</sup>, Chung-Jen Tseng<sup>a\*</sup>, Kan-Rong Lee<sup>a</sup>, Yu-Jui  
Hsueh<sup>a</sup>

<sup>a</sup> Department of Mechanical Engineering, National Central University, Taoyuan  
32001, Taiwan

<sup>b</sup> Institute of Materials Science and Engineering, National Central University,  
Taoyuan 32001, Taiwan

\*Corresponding author's name: Chung-Jen Tseng

Postal address: Department of Mechanical Engineering, National Central University,

No.300, Jhongda Rd., Jhongli District, Taoyuan City 32001, Taiwan

Telephone number: 886-3-4267348

Fax number: 886-3-4254501

E-mail address: [cjtseng@ncu.edu.tw](mailto:cjtseng@ncu.edu.tw)

Table S1 The d-spacing, Pt loading, surface Pt/Sn composition, grain size,  $I_{k085}$  and SA of Pt/C, Pt-Sn/C and Pt-Sn/OPC catalysts before and after ADT.

| Sample   | d-spacing (nm) | Pt loading (wt %) | Surface Pt/Sn composition | Grain size (nm) | $I_{k085}$ (mA/cm <sup>2</sup> ) |      | SA (mA/cm <sup>2</sup> ) |      |
|----------|----------------|-------------------|---------------------------|-----------------|----------------------------------|------|--------------------------|------|
|          |                |                   |                           |                 | fresh                            | 1500 | fresh                    | 1500 |
| Pt/C     | 0.2273         | 20.8              | -                         | 6.4             | 0.30                             | 0.04 | 0.04                     | 0.01 |
| PtSn/C   | 0.2287         | 18.4              | 54/46                     | 4.1             | 0.62                             | 0.13 | 0.08                     | 0.02 |
| PtSn/OPC | 0.2293         | 16.2              | 60/40                     | 4.3             | 1.40                             | 0.34 | 0.20                     | 0.06 |

$I_{k085}$  - the mixed kinetic-diffusion region (current density at E =0.85 V,  $I_{085}$ )

SA - specific activity

Table S2 Comparison of mass activity of various PtSn/C catalysts.

| Reference    | Experimental procedure                          | Sample    | Mass activity (mA mg <sup>-1</sup> Pt) |
|--------------|-------------------------------------------------|-----------|----------------------------------------|
|              |                                                 |           | 0.85 V                                 |
| Reference 35 | Bönnemann method                                | PtSn/C    | 13                                     |
| Reference 36 | Impregnation NaBH <sub>4</sub> reduction method | PtSn/C    | 18                                     |
|              |                                                 | Pt-Sn-300 | 22                                     |
|              |                                                 | Pt-Sn-500 | 22                                     |
| This study   | Alcohol reduction method                        | PtSn/C    | 63                                     |
|              |                                                 | PtSn/OPC  | 145                                    |

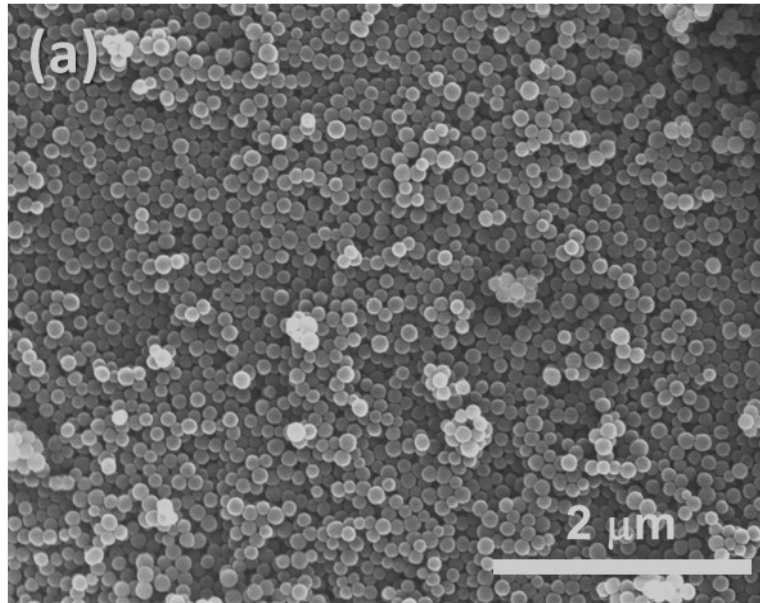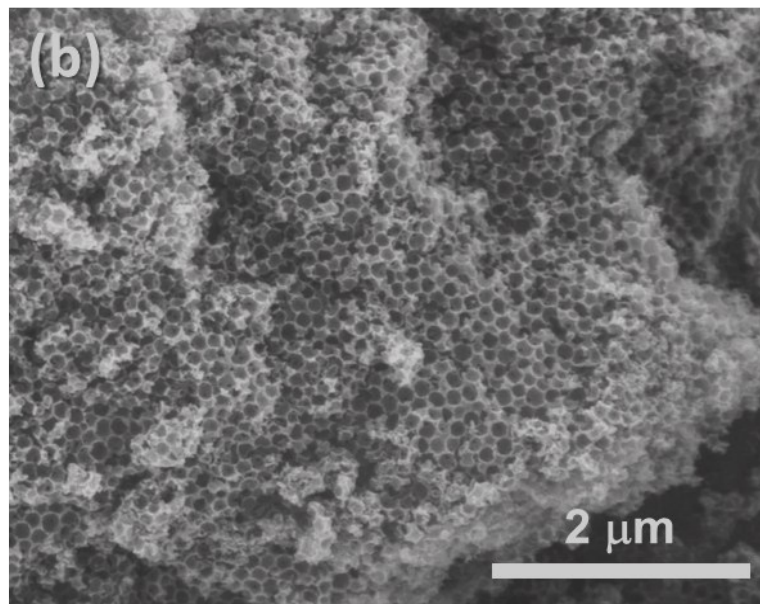

**Figure S1** SEM images of (a) silica particle and (b) OPC.

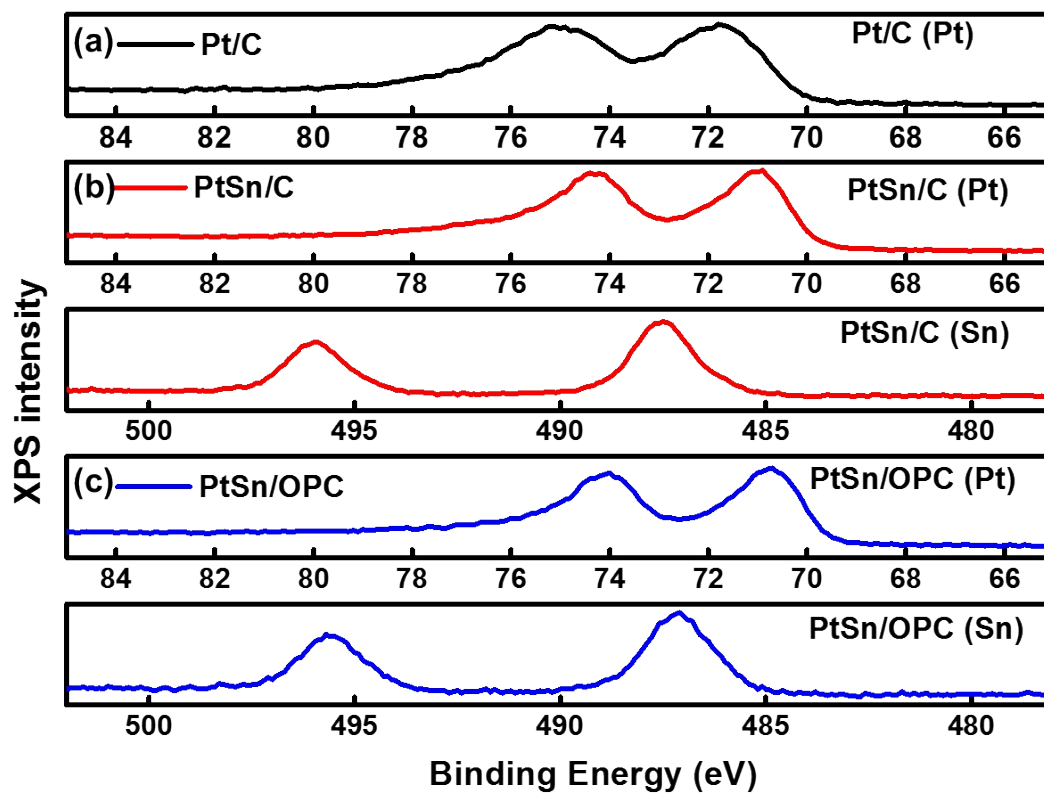

**Figure S2** XPS spectra of as-prepared (a) Pt/C, (b) PtSn/C and (c) PtSn/OPC catalysts.

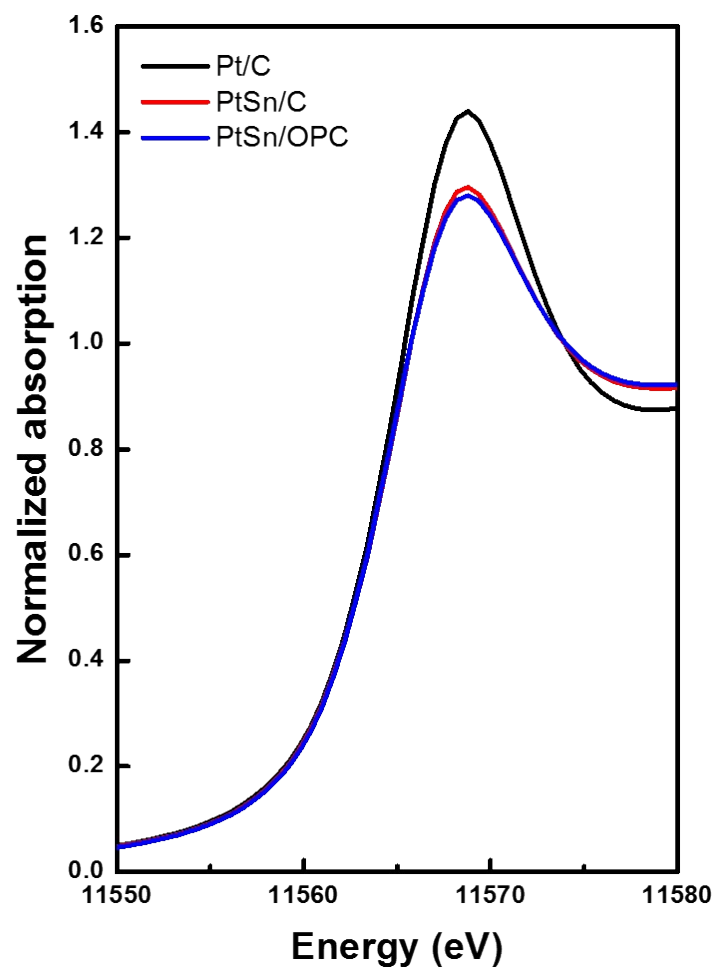

**Figure S3** The XANES spectra at the Pt L<sub>III</sub> edge for Pt/C, PtSn/C and PtSn/OPC catalysts.

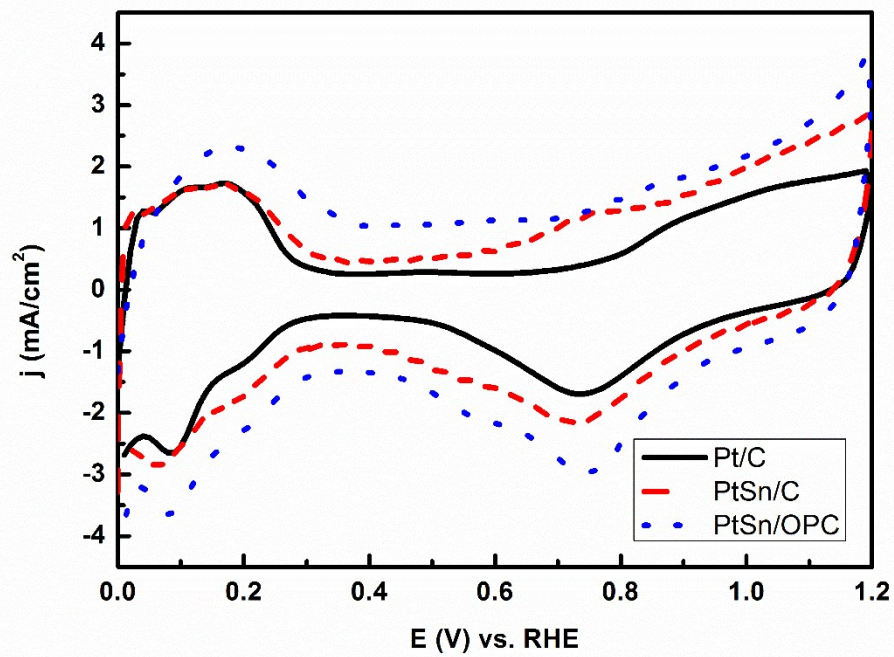

**Figure S4** CV curves of Pt/C, PtSn/C and PtSn/OPC catalysts in 0.5 M H<sub>2</sub>SO<sub>4</sub>.

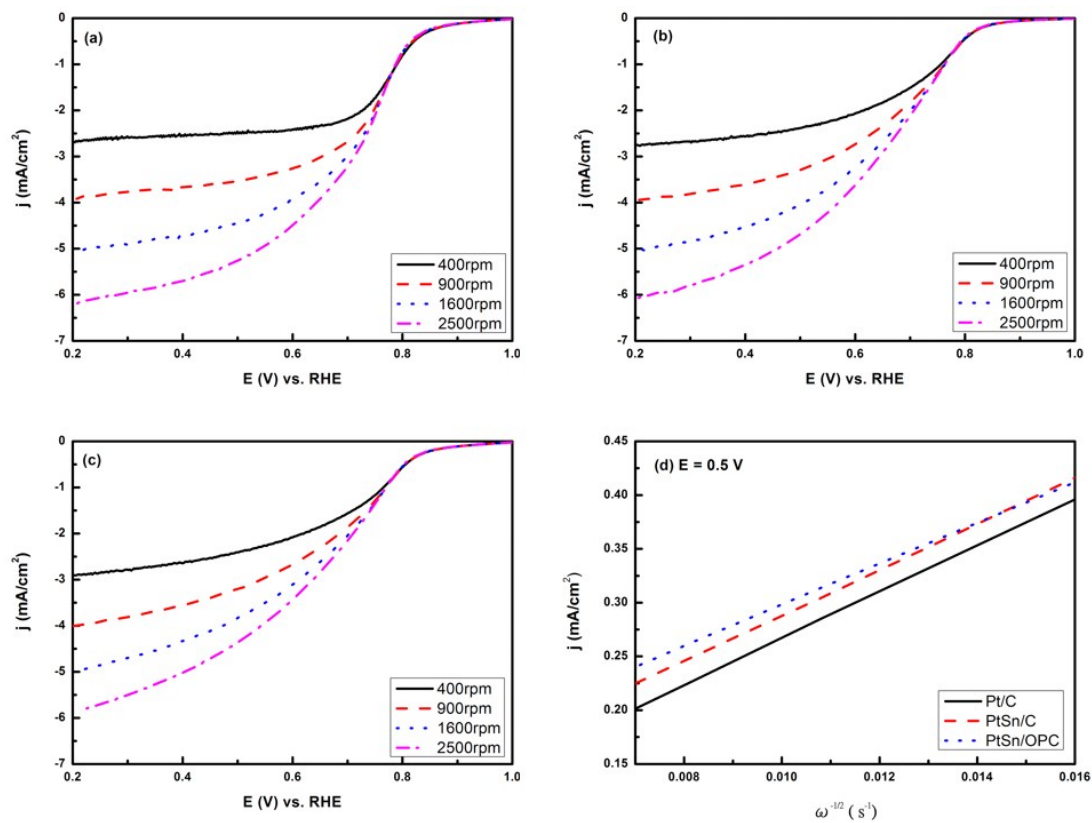

Figure S5 (a) Pt/C, (b) PtSn/C, and (c) PtSn/OPC catalysts recorded at different rotation rates (400-2500 rpm) in O<sub>2</sub> saturated 0.5M H<sub>2</sub>SO<sub>4</sub> aqueous solution with a scan rate of 5 mVs<sup>-1</sup>, and (d) the Koutecky-Levich plot at E = 0.5 V.

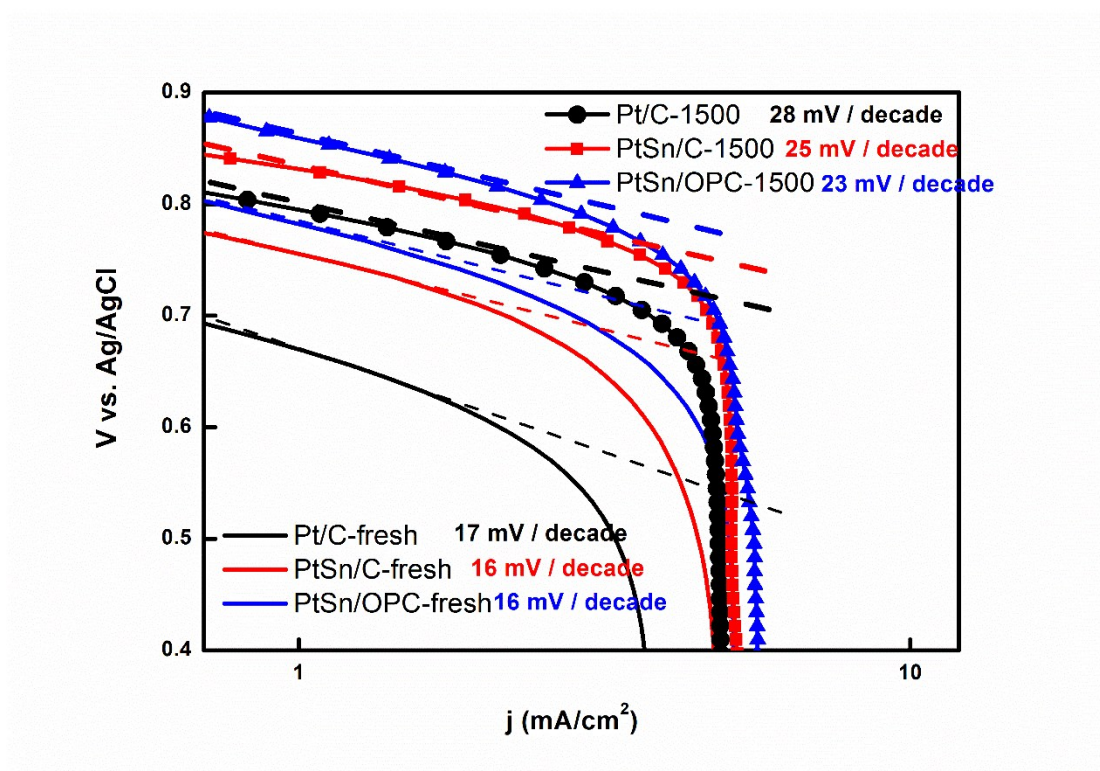

Fig. S6 Tafel plot of Pt/C, PtSn/C, PtSn/OPC catalysts in 0.5 M H<sub>2</sub>SO<sub>4</sub> with O<sub>2</sub> at 1600 rpm before and after ADT tests.



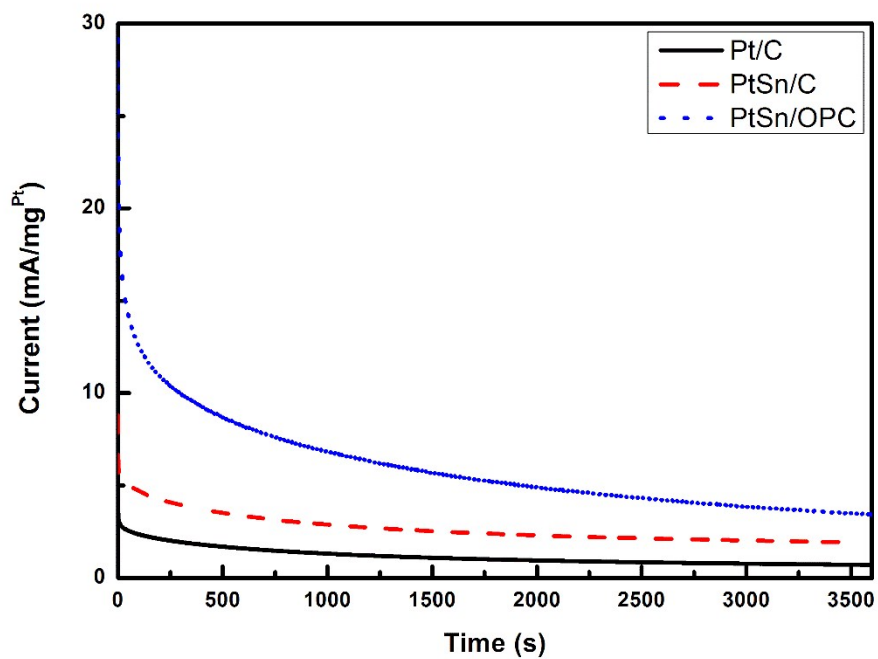

Fig. S7 CA curves of Pt/C, PtSn/C and PtSn/OPC catalysts recorded at 0.6 V (v.s. Ag/AgCl) in O<sub>2</sub>-saturated 0.5M H<sub>2</sub>SO<sub>4</sub> solution, rotation rate: 1600 rpm.
